# Supplementary material for: Progressive and Coordinated Mobilization of the Skeletal Muscle Niche throughout Tissue Repair Revealed by Single-Cell Proteomic Analysis
Source: MDPI journal article supplement (doi:10.3390/cells10040744), 2021-03-28
Supplement: s1 [file s1]

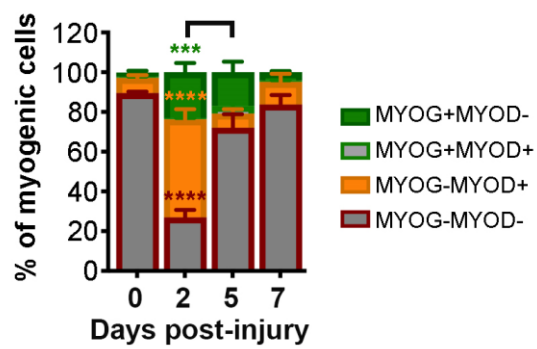

**Supplementary Figure 2.** Quantitative FACS analysis of mononucleated cells from single TAs. Graph showing the proportions of myogenic cells expressing MYOD and MYOG. Data are represented as the mean $\pm$ sem of minimum 4 isolated TAs. One way ANOVA with \*\*\* $p < 0.0001$  and \*\*\*\* $p < 0.05$  .
