# Supplementary material for: Progressive and Coordinated Mobilization of the Skeletal Muscle Niche throughout Tissue Repair Revealed by Single-Cell Proteomic Analysis
Source: MDPI journal article supplement (doi:10.3390/cells10040744), 2021-03-28
Supplement: s1 [file s1]

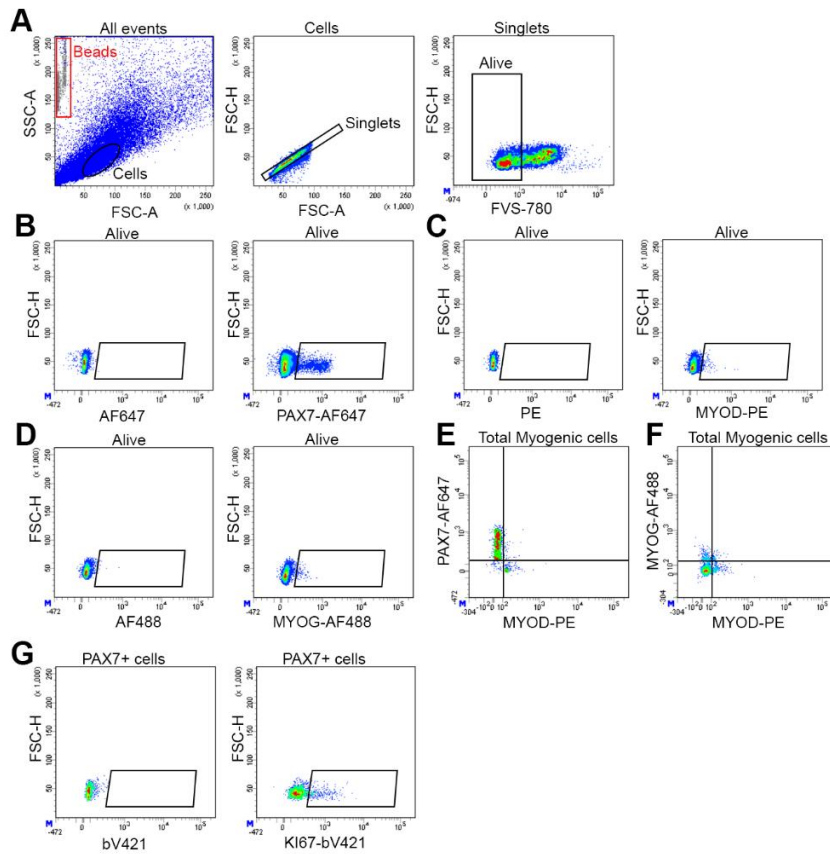

**Supplementary Figure 1.** Quantitative analysis of MuSC by flow cytometry. Mononucleated cells from single digested Tibialis anterior (TA) muscle were analyzed by flow cytometry at different time points post-injury, using Trucount™ Absolute Counting Tubes. **(A)** Debris, doublets and dead cells were excluded from the analysis. **(B-D)** Representative density scatterplots showing the expression of PAX7 **(B)**, MYOD **(C)** and MYOG **(D)** at 7DPI. Gates were positioned on the basis of FMO controls for each marker (left panels). **(E-F)** Joined gate PAX7+ or MYOD+ or MYOG+ cells was considered as the Total Myogenic cells (100%). Repartition of PAX7/MYOD **(E)** and MYOG/MYOD **(F)** expression. **(G)** Proportion of PAX7+ cells expressing KI67 at 7DPI.
